# Supplementary material for: Combination effect of ionic liquid components on the structure and properties in 1,4-benzenedicarboxylate based zinc metal–organic frameworks
Source: Royal Society of Chemistry journal article supplement (doi:10.1039/c5dt02672e), 2015-01-01
Supplement: c5dt02672e1.pdf [file c5dt02672e1.pdf]

## **Combination Effect of Ionic Liquid Components on Structure and Property in 1,4-benzenedicarboxylate based Zinc Metal-Organic Frameworks**

Zong-Hui Zhang<sup>a</sup>, Bing Liu<sup>b</sup>, Ling Xu<sup>a\*</sup>, Huan Jiao<sup>a\*</sup>

<sup>a</sup> *Key Laboratory of Macromolecular Science of Shaanxi Province, School of Chemistry & Chemical Engineering, Shaanxi Normal University, Xi'an, 710062, Shaanxi Province, P. R. China*

<sup>b</sup> *College of Chemistry and Chemical Engineering, Shaanxi University of Sciences and Technology, Xi'an, 710021, Shaanxi Province, P. R. China*

Table S1. Crystal and structure refinement data for compounds 1-6.

| Compounds                                                           | 1                                                                                              | 2                                                                                              | 3                                               | 4                                                                                              | 5                                                                                              | 6                                                                                              |
|---------------------------------------------------------------------|------------------------------------------------------------------------------------------------|------------------------------------------------------------------------------------------------|-------------------------------------------------|------------------------------------------------------------------------------------------------|------------------------------------------------------------------------------------------------|------------------------------------------------------------------------------------------------|
| Empirical formula                                                   | C <sub>36</sub> H <sub>34</sub> Cl <sub>2</sub> N <sub>4</sub> O <sub>12</sub> Zn <sub>3</sub> | C <sub>38</sub> H <sub>38</sub> Cl <sub>2</sub> N <sub>4</sub> O <sub>12</sub> Zn <sub>3</sub> | C <sub>8</sub> H <sub>6</sub> O <sub>5</sub> Zn | C <sub>36</sub> H <sub>34</sub> Br <sub>2</sub> N <sub>4</sub> O <sub>12</sub> Zn <sub>3</sub> | C <sub>38</sub> H <sub>38</sub> Br <sub>2</sub> N <sub>4</sub> O <sub>12</sub> Zn <sub>3</sub> | C <sub>40</sub> H <sub>42</sub> Br <sub>2</sub> N <sub>4</sub> O <sub>12</sub> Zn <sub>3</sub> |
| Color and Habit                                                     | colorless prism                                                                                | colorless prism                                                                                | colorless prism                                 | colorless Block                                                                                | colorless Block                                                                                | colorless Block                                                                                |
| Crystal Size (mm <sup>3</sup> )                                     | 0.20×0.02×0.01                                                                                 | 0.40×0.15×0.08                                                                                 | 0.10×0.10×0.05                                  | 0.40×0.30×0.10                                                                                 | 0.40×0.40×0.10                                                                                 | 0.40×0.20×0.20                                                                                 |
| Crystal system                                                      | Monoclinic                                                                                     | Monoclinic                                                                                     | Monoclinic                                      | Monoclinic                                                                                     | Monoclinic                                                                                     | Monoclinic                                                                                     |
| Space group                                                         | <i>P</i> 2 <sub>1</sub> / <i>n</i>                                                             | <i>P</i> 2 <sub>1</sub> / <i>n</i>                                                             | <i>C</i> 2/ <i>c</i>                            | <i>P</i> 2 <sub>1</sub> / <i>n</i>                                                             | <i>P</i> 2 <sub>1</sub> / <i>n</i>                                                             | <i>P</i> 2 <sub>1</sub> / <i>n</i>                                                             |
| <i>a</i> (Å)                                                        | 12.7216(7)                                                                                     | 12.7659(6)                                                                                     | 17.9537(10)                                     | 12.9467(5)                                                                                     | 13.0114(5)                                                                                     | 13.1135(14)                                                                                    |
| <i>b</i> (Å)                                                        | 9.4960(7)                                                                                      | 9.5790(4)                                                                                      | 6.3506(3)                                       | 9.4171(3)                                                                                      | 9.4909(4)                                                                                      | 9.7503(6)                                                                                      |
| <i>c</i> (Å)                                                        | 18.0900(11)                                                                                    | 18.0520(8)                                                                                     | 7.2542(4)                                       | 18.3370(7)                                                                                     | 18.3354(6)                                                                                     | 18.2437(18)                                                                                    |
| $\beta$ (°)                                                         | 108.228(7)                                                                                     | 108.206(5)                                                                                     | 91.419(5)                                       | 108.906(4)                                                                                     | 109.114(4)                                                                                     | 110.202(12)                                                                                    |
| <i>V</i> (Å <sup>3</sup> )                                          | 2075.7(2)                                                                                      | 2096.97(16)                                                                                    | 826.85(8)                                       | 2115.04(13)                                                                                    | 2139.41(14)                                                                                    | 2189.1(3)                                                                                      |
| <i>Z</i>                                                            | 2                                                                                              | 2                                                                                              | 4                                               | 2                                                                                              | 2                                                                                              | 2                                                                                              |
| <i>F</i> <sub>w</sub>                                               | 981.68                                                                                         | 1009.73                                                                                        | 247.50                                          | 1070.60                                                                                        | 1098.65                                                                                        | 1126.71                                                                                        |
| <i>D</i> <sub>calcd</sub> (Mgm <sup>-3</sup> )                      | 1.571                                                                                          | 1.599                                                                                          | 1.988                                           | 1.681                                                                                          | 1.705                                                                                          | 1.709                                                                                          |
| $\mu$ (mm <sup>-1</sup> )                                           | 1.912                                                                                          | 1.895                                                                                          | 2.960                                           | 3.639                                                                                          | 3.600                                                                                          | 3.521                                                                                          |
| <i>F</i> (000)                                                      | 996                                                                                            | 1028                                                                                           | 496                                             | 1068                                                                                           | 110                                                                                            | 1132                                                                                           |
| $\vartheta$ (°)                                                     | 3.43-25.03                                                                                     | 3.43-25.03                                                                                     | 3.40-25.01                                      | 3.82-25.02                                                                                     | 3.80-25.02                                                                                     | 3.75-25.02                                                                                     |
| Reflections measured                                                | 7356                                                                                           | 20009                                                                                          | 1391                                            | 8442                                                                                           | 8248                                                                                           | 9730                                                                                           |
| Independent reflections                                             | 3626                                                                                           | 3683                                                                                           | 728                                             | 3715                                                                                           | 3764                                                                                           | 3837                                                                                           |
|                                                                     | ( <i>R</i> <sub>int</sub> = 0.0408)                                                            | ( <i>R</i> <sub>int</sub> = 0.0515)                                                            | ( <i>R</i> <sub>int</sub> = 0.0223)             | ( <i>R</i> <sub>int</sub> = 0.0407)                                                            | ( <i>R</i> <sub>int</sub> = 0.0242)                                                            | ( <i>R</i> <sub>int</sub> = 0.0519)                                                            |
| Observed Reflection [ <i>I</i> > 2σ( <i>I</i> )]                    | 2561                                                                                           | 3208                                                                                           | 672                                             | 2951                                                                                           | 3145                                                                                           | 2858                                                                                           |
| Final <i>R</i> <sub>1</sub> , <i>wR</i> <sub>2</sub> indices (obs.) | 0.0605, 0.1267                                                                                 | 0.0444, 0.1282                                                                                 | 0.0290, 0.0720                                  | 0.0456, 0.1135                                                                                 | 0.0389, 0.1004                                                                                 | 0.0551, 0.1315                                                                                 |
| <i>R</i> <sub>1</sub> , <i>wR</i> <sub>2</sub> indices (all)        | 0.0735, 0.1314                                                                                 | 0.0522, 0.1373                                                                                 | 0.0320, 0.0740                                  | 0.0627, 0.1259                                                                                 | 0.0512, 0.1075                                                                                 | 0.0806, 0.1494                                                                                 |
| <i>S</i>                                                            | 1.001                                                                                          | 1.085                                                                                          | 1.061                                           | 1.083                                                                                          | 1.047                                                                                          | 1.039                                                                                          |
| ( $\Delta/\sigma$ ) <sub>max/min</sub>                              | 0.000, 0.000                                                                                   | 0.001, 0.000                                                                                   | 0.000, 0.000                                    | 0.000, 0.000                                                                                   | 0.000, 0.000                                                                                   | 0.000, 0.000                                                                                   |
| ( $\Delta\rho$ ) <sub>max/min</sub> (eÅ <sup>-3</sup> )             | 2.698, -0.803                                                                                  | 1.482, -0.548                                                                                  | 0.310, -0.481                                   | 1.122, -0.473                                                                                  | 1.236, -0.483                                                                                  | 1.112, -0.857                                                                                  |

Table S2. Crystal and structure refinement data for compounds 7-11.

| Compounds                                                           | 7                                               | 8                                                                                             | 9                                                                                             | 10                                                                                            | 11                                                                                            |
|---------------------------------------------------------------------|-------------------------------------------------|-----------------------------------------------------------------------------------------------|-----------------------------------------------------------------------------------------------|-----------------------------------------------------------------------------------------------|-----------------------------------------------------------------------------------------------|
| Empirical formula                                                   | C <sub>2</sub> H <sub>4</sub> O <sub>6</sub> Zn | C <sub>36</sub> H <sub>34</sub> I <sub>2</sub> N <sub>4</sub> O <sub>12</sub> Zn <sub>3</sub> | C <sub>38</sub> H <sub>38</sub> I <sub>2</sub> N <sub>4</sub> O <sub>12</sub> Zn <sub>3</sub> | C <sub>40</sub> H <sub>42</sub> I <sub>2</sub> N <sub>4</sub> O <sub>12</sub> Zn <sub>3</sub> | C <sub>42</sub> H <sub>46</sub> I <sub>2</sub> N <sub>4</sub> O <sub>12</sub> Zn <sub>3</sub> |
| Color and Habit                                                     | colorless prism                                 | colorless Block                                                                               | colorless Prism                                                                               | colorless Block                                                                               | colorless Prism                                                                               |
| Crystal Size (mm <sup>3</sup> )                                     | 0.40×0.20×0.08                                  | 0.20×0.10×0.05                                                                                | 0.20×0.20×0.02                                                                                | 0.22×0.14×0.08                                                                                | 0.12×0.03×0.02                                                                                |
| Crystal system                                                      | Monoclinic                                      | Monoclinic                                                                                    | Monoclinic                                                                                    | Monoclinic                                                                                    | Monoclinic                                                                                    |
| Space group                                                         | C2/c                                            | P2 <sub>1</sub> /n                                                                            | P2 <sub>1</sub> /n                                                                            | P2 <sub>1</sub> /c                                                                            | P2 <sub>1</sub> /c                                                                            |
| <i>a</i> (Å)                                                        | 11.786(3)                                       | 13.2282(8)                                                                                    | 13.3440(9)                                                                                    | 13.2721(12)                                                                                   | 13.3605(10)                                                                                   |
| <i>b</i> (Å)                                                        | 5.3955(5)                                       | 9.3686(3)                                                                                     | 9.4033(6)                                                                                     | 9.6225(7)                                                                                     | 9.8772(4)                                                                                     |
| <i>c</i> (Å)                                                        | 9.712(3)                                        | 18.6590(7)                                                                                    | 18.5203(12)                                                                                   | 18.4952(12)                                                                                   | 18.3026(9)                                                                                    |
| $\beta$ (°)                                                         | 126.22(3)                                       | 110.270(5)                                                                                    | 110.126(7)                                                                                    | 107.452(8)                                                                                    | 108.303(7)                                                                                    |
| <i>V</i> (Å <sup>3</sup> )                                          | 498.3(2)                                        | 2169.20(17)                                                                                   | 2182.0(2)                                                                                     | 2253.3(3)                                                                                     | 2293.1(2)                                                                                     |
| <i>Z</i>                                                            | 4                                               | 2                                                                                             | 2                                                                                             | 2                                                                                             | 2                                                                                             |
| <i>Fw</i>                                                           | 189.42                                          | 1164.58                                                                                       | 1192.63                                                                                       | 1220.69                                                                                       | 1248.74                                                                                       |
| <i>D</i> <sub>calcd</sub> (Mgm <sup>-3</sup> )                      | 2.525                                           | 1.783                                                                                         | 1.815                                                                                         | 1.799                                                                                         | 1.809                                                                                         |
| $\mu$ (mm <sup>-1</sup> )                                           | 4.881                                           | 3.130                                                                                         | 3.114                                                                                         | 3.017                                                                                         | 2.967                                                                                         |
| <i>F</i> (000)                                                      | 376                                             | 1140                                                                                          | 1172                                                                                          | 1204                                                                                          | 1236                                                                                          |
| $\vartheta$ (°)                                                     | 4.29-25.00                                      | 3.77-25.02                                                                                    | 3.74-25.03                                                                                    | 3.73-25.02                                                                                    | 3.69-25.03                                                                                    |
| Reflections measured                                                | 832                                             | 9024                                                                                          | 8579                                                                                          | 9682                                                                                          | 9289                                                                                          |
| Independent reflections                                             | 439 (R <sub>int</sub> = 0.0318)                 | 3806 (R <sub>int</sub> = 0.0432)                                                              | 3821 (R <sub>int</sub> = 0.0732)                                                              | 3945 (R <sub>int</sub> = 0.0463)                                                              | 4028 (R <sub>int</sub> = 0.0786)                                                              |
| Observed Reflection [ <i>I</i> >2σ( <i>I</i> )]                     | 413                                             | 2841                                                                                          | 1901                                                                                          | 3008                                                                                          | 2361                                                                                          |
| Final <i>R</i> <sub>1</sub> , <i>wR</i> <sub>2</sub> indices (obs.) | 0.0399 0.1071                                   | 0.0451, 0.1061                                                                                | 0.0753, 0.1491                                                                                | 0.0715, 0.1770                                                                                | 0.0628, 0.1129                                                                                |
| <i>R</i> <sub>1</sub> , <i>wR</i> <sub>2</sub> indices (all)        | 0.0418, 0.1086                                  | 0.0702, 0.1210                                                                                | 0.1437, 0.1775                                                                                | 0.0932, 0.1920                                                                                | 0.1243, 0.1383                                                                                |
| <i>S</i>                                                            | 1.086                                           | 1.018                                                                                         | 1.020                                                                                         | 1.070                                                                                         | 0.997                                                                                         |
| (Δ/σ) <sub>max/min</sub>                                            | 0.000, 0.000                                    | 0.000, 0.000                                                                                  | 0.008, 0.001                                                                                  | 0.009, 0.001                                                                                  | 0.000, 0.000                                                                                  |
| (Δρ) <sub>max/min</sub> (eÅ <sup>-3</sup> )                         | 1.190, -0.958                                   | 0.752, -1.287                                                                                 | 1.713, -1.204                                                                                 | 1.867, -1.267                                                                                 | 1.110, -0.642                                                                                 |

Table S3. Selected bond distances (Å) and bond angles (°) of compounds **1-4**.

| <b>1</b>                                                                                    | <b>2</b>                                                                                     | <b>3</b>                                                                      | <b>4</b>                                                                                    |
|---------------------------------------------------------------------------------------------|----------------------------------------------------------------------------------------------|-------------------------------------------------------------------------------|---------------------------------------------------------------------------------------------|
| Zn1-O14#1 = 1.952(4)                                                                        | Zn1-O13#1 = 1.963(2)                                                                         | Zn1-O12#1 = 1.946(2)                                                          | Zn1-O11 = 1.950(3)                                                                          |
| Zn1-O12#2 = 1.955(4)                                                                        | Zn1-O11 = 1.965(2)                                                                           | Zn1-O1W = 1.976(3)                                                            | Zn1-O13#1 = 1.964(3)                                                                        |
| Zn1-O21 = 1.976(4)                                                                          | Zn1-O21 = 1.976(2)                                                                           | Zn1-O11 = 2.182(2)                                                            | Zn1-O21#2 = 1.977(3)                                                                        |
| Zn1-Cl1 = 2.2096(18)                                                                        | Zn1-Cl1 = 2.2086(11)                                                                         | O12#1-Zn(1-O12#2 = 138.85(13)                                                 | Zn1-Br1 = 2.3493(7)                                                                         |
| Zn2-O11 = 2.021(4)                                                                          | Zn2-O14#1 = 2.029(2)                                                                         | O12#1-Zn1-O1W = 110.57(7)                                                     | Zn2-O14#1 = 2.021(3)                                                                        |
| Zn2-O13#1 = 2.046(4)                                                                        | Zn2-O12 = 2.050(2)                                                                           | O12#1-Zn1-O11 = 93.74(8)                                                      | Zn2-O12 = 2.066(3)                                                                          |
| Zn2-O21 = 2.200(4)                                                                          | Zn2-O21 = 2.205(2)                                                                           | O12#2-Zn1-O11 = 88.27(8)                                                      | Zn2-O21 = 2.194(3)                                                                          |
| O14#1-Zn1-O12#2 = 110.1(2)                                                                  | O13#1-Zn1-O11 = 110.83(13)                                                                   | O1W-Zn1-O11 = 87.14(5)                                                        | O11-Zn1-O13#1 = 109.58(15)                                                                  |
| O14#1-Zn1-O21 = 109.80(16)                                                                  | O13#1-Zn1-O21 = 100.54(10)                                                                   | O11#3-Zn1-O11 = 174.28(10)                                                    | O11-Zn1-O21#2 = 110.93(13)                                                                  |
| O12#2-Zn1-O21 = 101.53(16)                                                                  | O11-Zn1-O21 = 110.47(10)                                                                     | C14-O11-Zn1 = 123.86(17)                                                      | O13#1-Zn1-O21#2 = 101.80(13)                                                                |
| O14#1-Zn1-Cl1 = 112.72(13)                                                                  | O13#1-Zn1-Cl1 = 104.59(9)                                                                    | C14-O12-Zn1#1 = 122.09(19)                                                    | O11-Zn1-Br1 = 113.08(11)                                                                    |
| O12#2-Zn1-Cl1 = 105.76(13)                                                                  | O11-Zn1-Cl1 = 111.42(8)                                                                      |                                                                               | O13#1-Zn1-Br1 = 105.02(10)                                                                  |
| O21-Zn1-Cl1 = 116.18(14)                                                                    | O21-Zn1-Cl1 = 118.16(8)                                                                      |                                                                               | O21#2-Zn1-Br1 = 115.50(9)                                                                   |
| O11-Zn2-O13#3 = 95.37(18)                                                                   | O14#2-Zn2-O12 = 84.78(12)                                                                    |                                                                               | O14#1-Zn2-O12 = 95.68(14)                                                                   |
| O11-Zn2-O13#1 = 84.63(18)                                                                   | O14#1-Zn2-O12 = 95.22(12)                                                                    |                                                                               | O14#3-Zn2-O12 = 84.32(14)                                                                   |
| O11-Zn2-O21#2 = 91.41(15)                                                                   | O14#2-Zn2-O21 = 88.16(10)                                                                    |                                                                               | O14#1-Zn2-O21 = 88.63(12)                                                                   |
| O11-Zn2-O21 = 88.59(15)                                                                     | O14#1-Zn2-O21 = 91.84(10)                                                                    |                                                                               | O14#3-Zn2-O21 = 91.37(12)                                                                   |
| O13#3-Zn2-O21 = 91.84(16)                                                                   | O12-Zn2-O21 = 88.34(10)                                                                      |                                                                               | O12#2-Zn2-O21 = 87.86(12)                                                                   |
| O13#1-Zn2-O21 = 88.16(16)                                                                   | O12-Zn2-O21#3 = 91.66(10)                                                                    |                                                                               | O12-Zn2-O21 = 92.14(12)                                                                     |
| Symmerty codes: #1 = -x+5/2, y+1/2, -z+1/2; #2 = -x+2, -y+2, -z; #3 = x-1/2, -y+3/2, z-1/2. | Symmerty codes: #1 = x+1/2, -y+1/2, z+1/2; #2 = -x-1/2, y+1/2, -z+1/2; #3 = -x, -y+1, -z+10. | Symmerty codes: #1 = -x, -y+1, -z+1; #2 = x, -y+1, z+1/2; #3 = -x, y, -z+3/2. | Symmerty codes: #1 = x-1/2, -y+5/2, z-1/2; #2 = -x+2, -y+2, -z; #3 = -x+5/2, y-1/2, -z+1/2. |

Table S4. Selected bond distances (Å) and bond angles (°) of compounds 5-8.

| 5                                                                                         | 6                                                                                         | 7                                                                        | 8                                                                                          |
|-------------------------------------------------------------------------------------------|-------------------------------------------------------------------------------------------|--------------------------------------------------------------------------|--------------------------------------------------------------------------------------------|
| Zn1-O14#1 = 1.956(3)                                                                      | Zn1-O12 = 1.964(4)                                                                        | Zn1-O1 = 2.072(4)                                                        | Zn1-O11= 1.947(4)                                                                          |
| Zn1-O12#2 = 1.962(3)                                                                      | Zn1-O14#1 = 1.972(4)                                                                      | Zn1-O2#2 = 2.086(4)                                                      | Zn1-O13#1= 1.968(4)                                                                        |
| Zn1-O21 = 1.976(3)                                                                        | Zn1-O21 = 1.994(4)                                                                        | Zn1-O1W = 2.115(4)                                                       | Zn1-O21= 1.970(4)                                                                          |
| Zn1-Br1 = 2.3537(6)                                                                       | Zn1-Br1 = 2.3547(10)                                                                      | O1-Zn1-O1#1 = 80.76(19)                                                  | Zn1-l1= 2.5472(8)                                                                          |
| Zn2-O11 = 2.032(3)                                                                        | Zn2-O13#1 = 2.018(4)                                                                      | O1-Zn1-O2#2 = 179.83(17)                                                 | Zn2-O14#1= 2.022(4)                                                                        |
| Zn2-O13#1 = 2.060(3)                                                                      | Zn2-O11 = 2.071(4)                                                                        | O1-Zn1-O2#3 = 99.39(14)                                                  | Zn2-O12= 2.065(4)                                                                          |
| Zn2-O21 = 2.196(3)                                                                        | Zn2-O21 = 2.217(4)                                                                        | O2#2-Zn1-O2#3 = 80.5(2)                                                  | Zn2-O21= 2.187(4)                                                                          |
| O14#1-Zn1-O12#2 = 110.09(14)                                                              | O12-Zn1-O14#1 = 109.07(17)                                                                | O1-Zn1-O1W#1 = 88.84(15)                                                 | O11-Zn1-O13#1= 108.79(19)                                                                  |
| O14#1-Zn1-O21 = 110.99(12)                                                                | O12-Zn1-O21 = 112.70(16)                                                                  | O1-Zn1-O1W = 89.15(15)                                                   | O11-Zn1-O21= 110.91(17)                                                                    |
| O12#2-Zn1-O21 = 100.90(12)                                                                | O14#1-Zn1-O21 = 100.89(16)                                                                | O1#1-Zn1-O1W = 88.84(15)                                                 | O13#1-Zn1-O21= 102.29(17)                                                                  |
| O14#1-Zn1-Br1 = 112.27(9)                                                                 | O12-Zn1-Br1 = 109.99(13)                                                                  | O2#2-Zn1-O1W = 90.93(16)                                                 | O11-Zn1-l1= 114.42(13)                                                                     |
| O12#2-Zn1-Br1 = 103.97(9)                                                                 | O14#1-Zn1-Br1 = 103.23(13)                                                                | O2#3-Zn1-O1W = 91.09(15)                                                 | O13#1-Zn1-l1= 104.54(13)                                                                   |
| O21-Zn1-Br1 = 117.56(8)                                                                   | O21-Zn1-Br1 = 119.64(11)                                                                  | O1W#1-Zn1-O1W = 177.4(2)                                                 | O21-Zn1-l1= 114.78(11)                                                                     |
| O11-Zn2-O13#3 = 95.56(13)                                                                 | O13#2-Zn2-O11 = 85.03(18)                                                                 |                                                                          | O14#2-Zn2-O12= 84.52(19)                                                                   |
| O11-Zn2-O13#1 = 84.44(13)                                                                 | O13#1-Zn2-O11 = 94.97(18)                                                                 |                                                                          | O14#1-Zn2-O12= 95.48(19)                                                                   |
| O11-Zn2-O21#2 = 91.23(11)                                                                 | O13#2-Zn2-O21 = 88.38(15)                                                                 |                                                                          | O12-Zn2-O21#3= 92.00(15)                                                                   |
| O11-Zn2-O21 = 88.77(11)                                                                   | O13#1-Zn2-O21 = 91.62(15)                                                                 |                                                                          | O14#2-Zn2-O21= 88.92(15)                                                                   |
| O13#3-Zn2-O21 = 92.10(11)                                                                 | O11-Zn2-O21 = 89.29(15)                                                                   |                                                                          | O14#1-Zn2-O21= 91.08(16)                                                                   |
| O13#1-Zn2-O21 = 87.90(11)                                                                 | O11#3-Zn2-O21 = 90.71(15)                                                                 |                                                                          | O12-Zn2-O21= 88.00(15)                                                                     |
| Symmerty codes: #1 = -x+5/2, y-1/2, -z+1/2; #2 = -x+2, -y, -z; #3 = x-1/2, -y+1/2, z-1/2. | Symmerty codes: #1 = x-1/2, -y+3/2, z-1/2; #2 -x+3/2, y-1/2, -z+1/2; #3 = -x+1, -y+1, -z. | Symmerty codes: #1 = -x, y, -z+1/2; 2 = -x, y+1, -z+1/2; #3 = x, y+1, z. | Symmerty codes:#1 = x-1/2, -y+5/2, z-1/2; #2 = -x+5/2, y-1/2, -z+1/2; #3 = -x+2, -y+2, -z. |

Table S5. Selected bond distances (Å) and bond angles (°) of compounds **9-11**.

| <b>9</b>                                                                                  | <b>10</b>                                                                                | <b>11</b>                                                                             |
|-------------------------------------------------------------------------------------------|------------------------------------------------------------------------------------------|---------------------------------------------------------------------------------------|
| Zn1-O21 = 1.947(9)                                                                        | Zn1-O12= 1.949(4)                                                                        | Zn1-O13#1= 1.976(4)                                                                   |
| Zn1-O14#1 = 1.962(7)                                                                      | Zn1-O24#1= 1.970(4)                                                                      | Zn1-O11= 1.980(3)                                                                     |
| Zn1-O12#2 = 1.961(8)                                                                      | Zn1-O22= 1.983(3)                                                                        | Zn1-O21= 1.995(4)                                                                     |
| Zn1-I1 = 2.537(2)                                                                         | Zn1-I1= 2.5656(7)                                                                        | Zn1-I1= 2.5669(9)                                                                     |
| Zn2-O13 = 2.015(10)                                                                       | Zn2-O13#1= 2.020(4)                                                                      | Zn2-O14#1= 2.022(4)                                                                   |
| Zn2-O11#2 = 2.010(9)                                                                      | Zn2-O11= 2.065(3)                                                                        | Zn2-O12= 2.058(3)                                                                     |
| Zn2-O21 = 2.204(9)                                                                        | Zn2-O22= 2.197(3)                                                                        | Zn2-O21= 2.230(4)                                                                     |
| O21-Zn1-O14#1 = 105.8(3)                                                                  | O12-Zn1-O24#1= 108.20(17)                                                                | O13#1-Zn1-O11= 106.32(16)                                                             |
| O21-Zn1-O12#2 = 105.4(4)                                                                  | O12-Zn1-O22= 113.08(16)                                                                  | O13#1-Zn1-O21= 103.56(15)                                                             |
| O14#1-Zn1-O12#2 = 109.2(4)                                                                | O24#1-Zn1-O22= 100.17(14)                                                                | O11-Zn1-O21= 114.56(16)                                                               |
| O21-Zn1-I1 = 119.6(3)                                                                     | O12-Zn1-I1= 110.85(11)                                                                   | O13#1-Zn1-I1= 101.85(13)                                                              |
| O14#1-Zn1-I1 = 108.6(3)                                                                   | O24#1-Zn1-I1= 103.25(12)                                                                 | O11-Zn1-I1= 111.02(12)                                                                |
| O12#2-Zn1-I1 = 107.9(3)                                                                   | O22-Zn1-I1= 119.59(10)                                                                   | O21-Zn1-I1= 117.69(11)                                                                |
| O13-Zn2-O11#2 = 84.7(4)                                                                   | O13#2-Zn2-O11= 85.45(16)                                                                 | O14#1-Zn2-O12= 94.27(16)                                                              |
| O13-Zn2-O11#3 = 95.3(4)                                                                   | O13#1-Zn2-O11= 94.55(16)                                                                 | O14#2-Zn2-O12= 85.73(16)                                                              |
| O13-Zn2-O21 = 91.6(4)                                                                     | O13#2-Zn2-O22= 89.16(14)                                                                 | O12-Zn2-O21#3= 91.79(14)                                                              |
| O13#1-Zn2-O21 = 88.4(4)                                                                   | O13#1-Zn2-O22= 90.84(14)                                                                 | O14#1-Zn2-O21= 92.49(15)                                                              |
| O11#2-Zn2-O21 = 89.2(4)                                                                   | O11#3-Zn2-O22= 92.20(14)                                                                 | O14#2-Zn2-O21= 87.51(15)                                                              |
| O11#3-Zn2-O21 = 90.8(4)                                                                   | O11-Zn2-O22= 87.80(14)                                                                   | O12-Zn2-O21= 88.21(14)                                                                |
| Symmerty codes: #1 = -x, -y, -z; #2 = -x+1/2, y-1/2, z+1/2;<br>#3 = x-1/2, -y+1/2, z-1/2. | Symmerty codes: #1 = x, -y+5/2, z+1/2; #2 = -x+2,<br>y-1/2, -z-1/2; #3 = -x+2, -y+2, -z. | Symmerty codes: #1 = x, -y+5/2, z-1/2; #2 = -<br>x, y-1/2, -z+1/2; #3 = -x, -y+2, -z. |

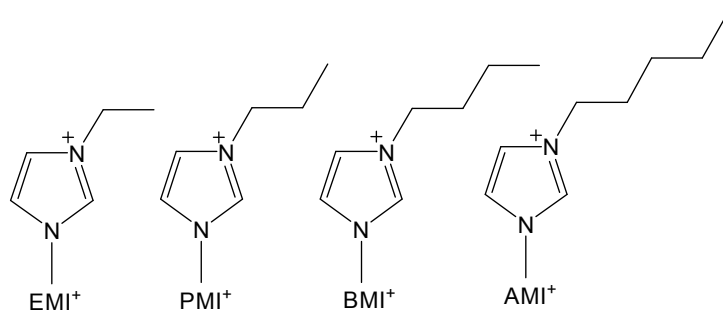

Scheme S1. The structure motifs of RMI<sup>+</sup> cations

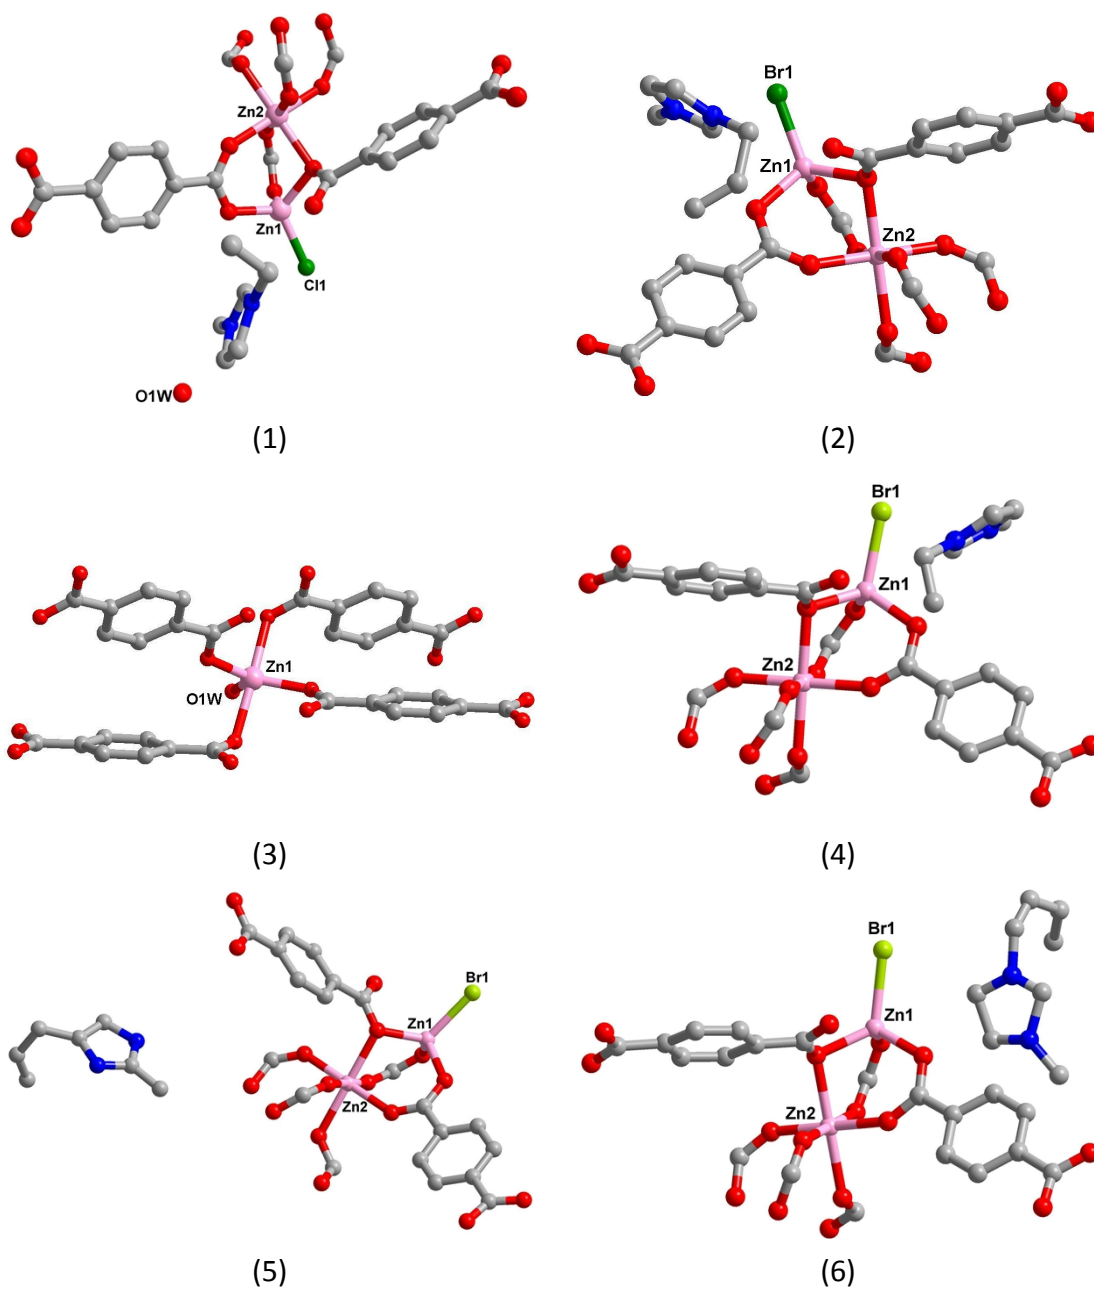

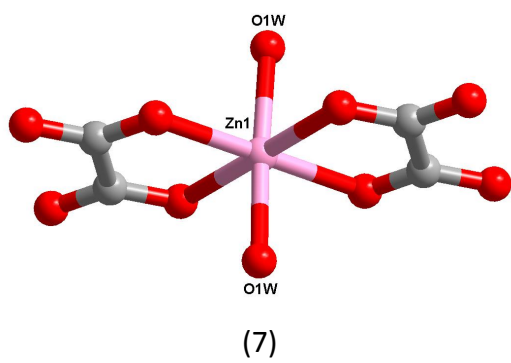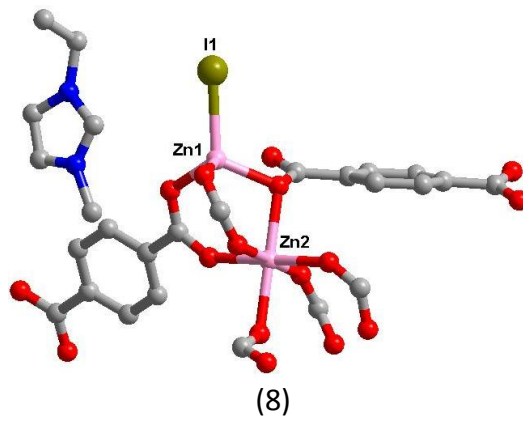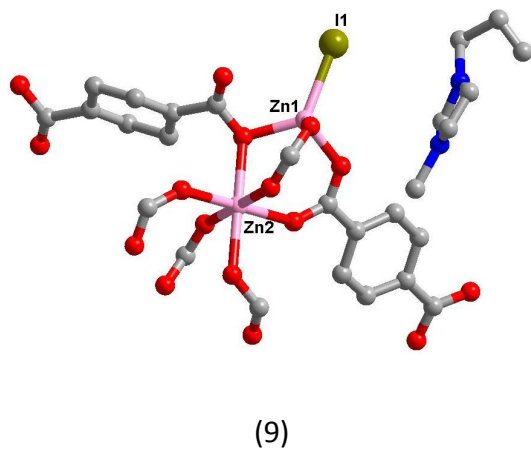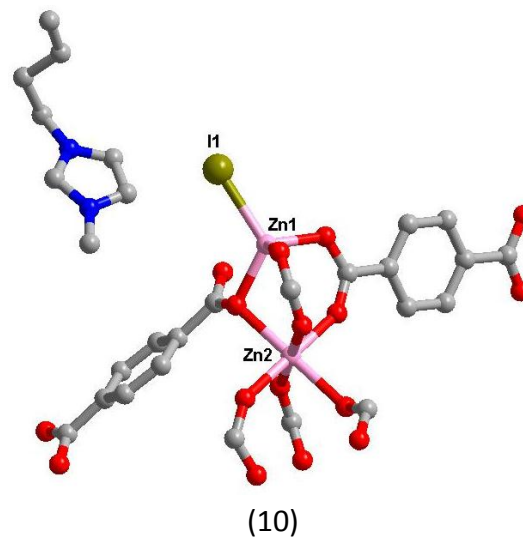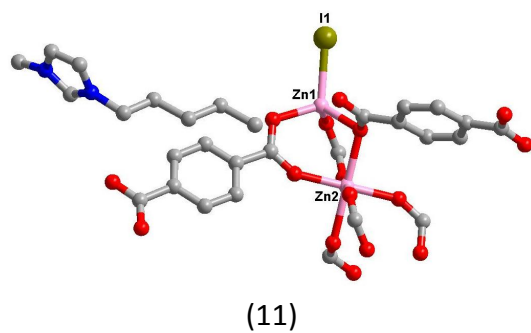

Fig. S1 Coordination spheres of Zn(II) centers in compounds **1-11**.



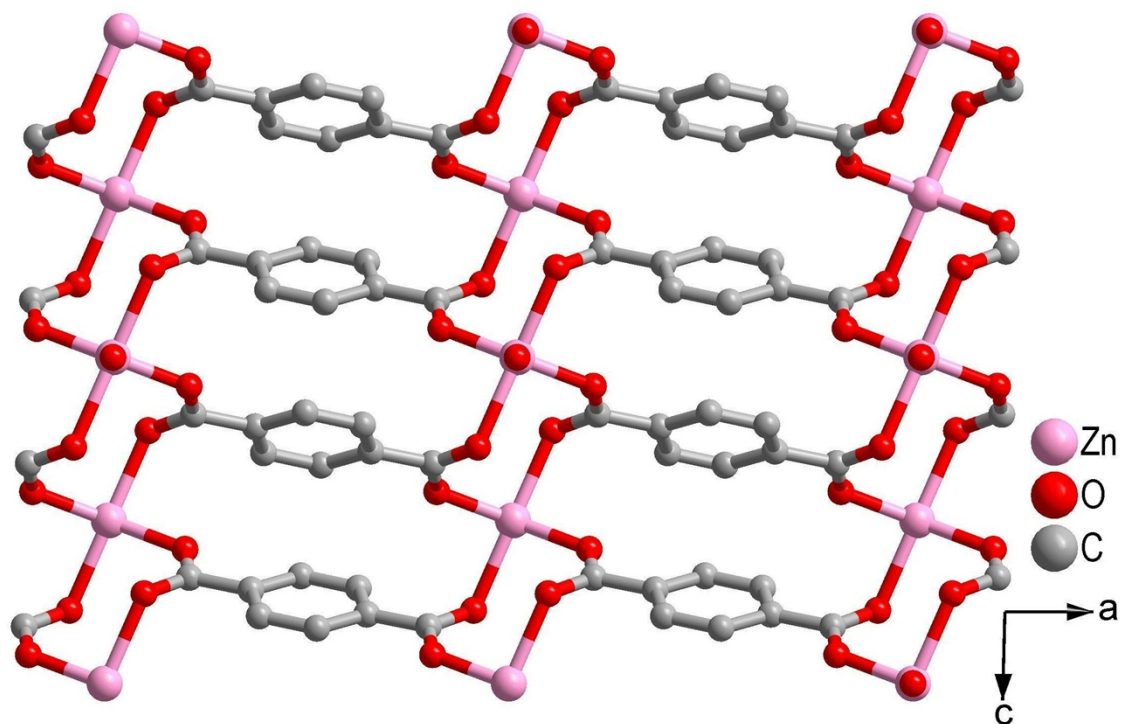

Fig. S2. The 2D layer along the ac-plane in compound 3.

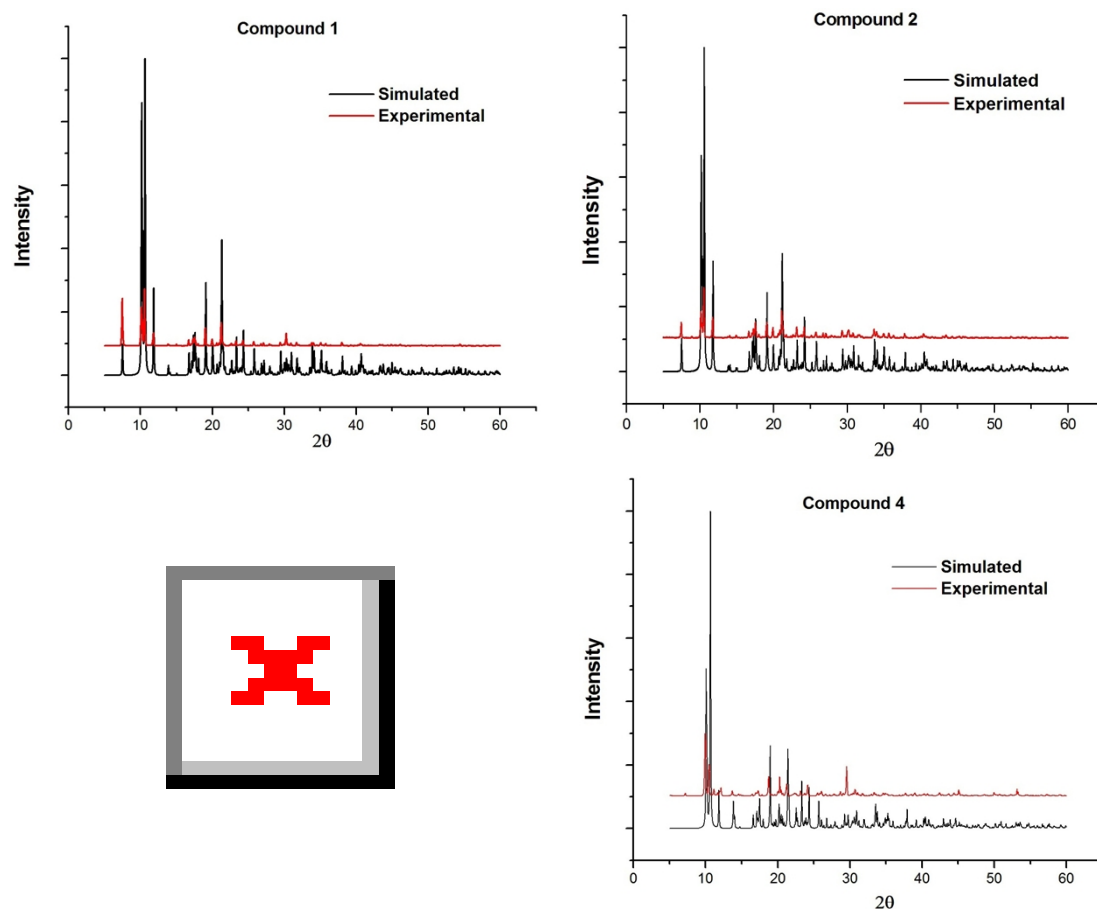

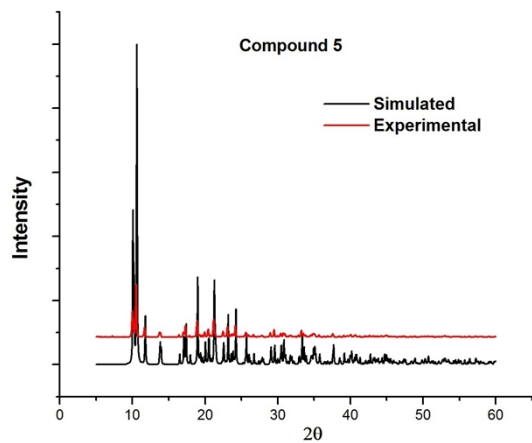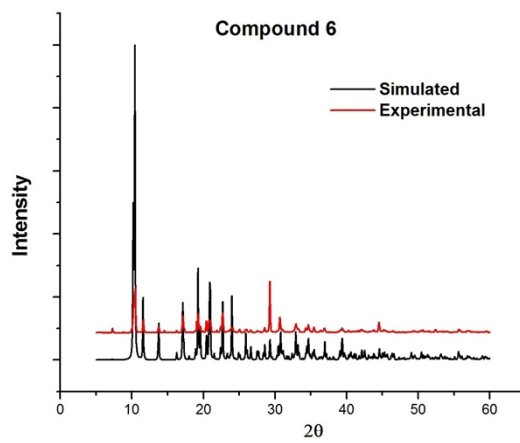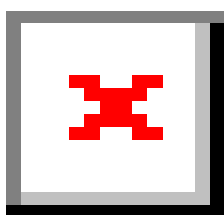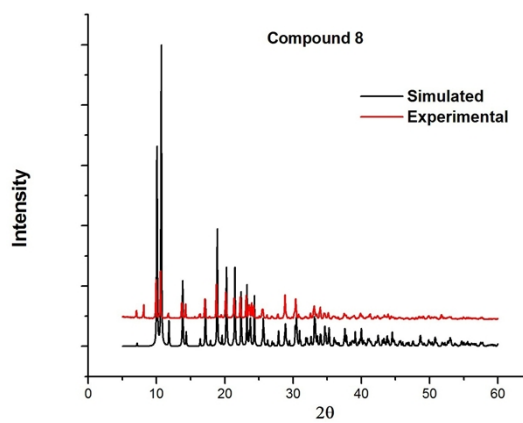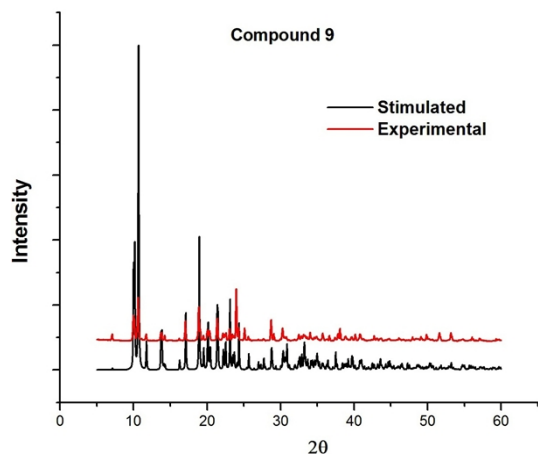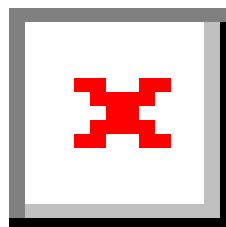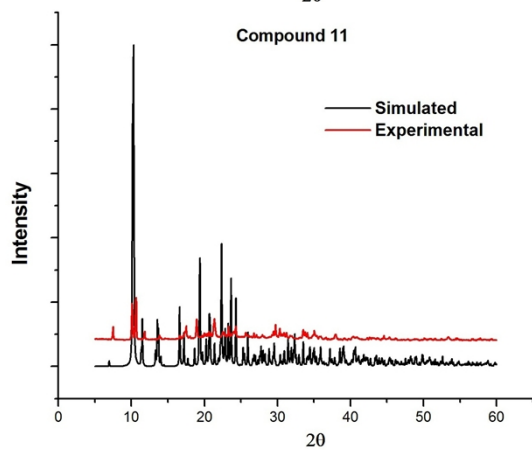

Fig. S3 Comparison of X-ray powder diffraction patterns of compounds **1-11** to those simulated from single crystal structure data.
